# Supplementary material
Source: publisher figshare collection journal article supplement (https://acs.figshare.com/ndownloader/files/4712425)
Supplement: Supplementary file 1 [file 4712425]

data_General
_audit_creation_date                  '2006-10-19'
_audit_creation_method                'by CrystalStructure 3.7.0'
_audit_update_record                   ?

#==============================================================================

# PROCESSING SUMMARY (IUCr Office Use Only)

_journal_date_recd_electronic     ?
_journal_date_from_coeditor       ?
_journal_date_accepted            ?
_journal_coeditor_code            ?

#==============================================================================

# SUBMISSION DETAILS

_publ_contact_author_name             'Fujioka Firomichi, Kenichi Murai, Ozora Kubo, Yusuke Ohba, Yasuyuki'
_publ_contact_author_email            'fujioka@phs.osaka-u.ac.jp, kita@phs.osaka-u.ac.jp'
_publ_contact_author_fax              '(+81)-6-6879-8229'
_publ_contact_author_phone            '(+81)-6-6879-8225'
_publ_contact_letter
;
    ENTER TEXT OF LETTER
;
_publ_requested_journal               'ENTER JOURNAL NAME HERE'
_publ_requested_category              'CHOOSE FI FM FO CI CM CO or AD'
_publ_requested_coeditor_name          ?

#==============================================================================

# TITLE AND AUTHOR LIST

_publ_section_title
;
    ENTER SECTION TITLE
;
_publ_section_title_footnote
;
    ENTER FOOTNOTE TO TITLE OF PAPER
;
loop_
_publ_author_name
_publ_author_footnote
_publ_author_address
' FIRST AUTHORS NAME '
;
  FIRST AUTHORS FOOTNOTES
;
;
  FIRST AUTHORS ADDRESS
;
_publ_section_synopsis
;
  ENTER SYNOPSIS
;

#==============================================================================

# TEXT

_publ_section_abstract
;
    ENTER ABSTRACT
;
_publ_section_comment
;
    ENTER TEXT
;
_publ_section_references
;
    ENTER OTHER REFERENCES

    Rigaku/MSC and Rigaku Corporation. (2005).
    CrystalStructure 3.7.0.
    Single Crystal Structure Analysis Software.
    Rigaku/MSC, 9009 New Trails Drive, The Woodlands, TX, USA 77381-5209.
    Rigaku, 3-9-12 Akishima, Tokyo 196-8666, Japan.

    Watkin, D.J., Prout, C.K. Carruthers, J.R. & Betteridge, P.W. (1996)
    CRYSTALS Issue 10, Chemical Crystallography Laboratory, Oxford, UK.

;
_publ_section_figure_captions
;
    ENTER FIGURE CAPTIONS
;
_publ_section_exptl_prep
;
    ENTER COMPOUND PREPARATION DETAILS
;
_publ_section_exptl_refinement
;
    ENTER SPECIAL DETAILS OF THE REFINEMENT
;

#==============================================================================

data__061017

#==============================================================================

# CHEMICAL DATA

_chemical_formula_sum                  'C15 H18 N2 O2 '
_chemical_formula_moiety               'C15 H18 N2 O2 '
_chemical_formula_weight               258.32
_chemical_melting_point                ?

#==============================================================================

# CRYSTAL DATA
_symmetry_cell_setting                 monoclinic
_symmetry_space_group_name_H-M        'P 1 21/n 1'
_symmetry_space_group_name_Hall       '-P 2yn'
_symmetry_Int_Tables_number            14
loop_
_symmetry_equiv_pos_site_id
_symmetry_equiv_pos_as_xyz
1   '+X,+Y,+Z'
2   '1/2-X,1/2+Y,1/2-Z'
3   '-X,-Y,-Z'
4   '1/2+X,1/2-Y,1/2+Z'

#------------------------------------------------------------------------------

_cell_length_a                         6.34620(10)
_cell_length_b                         10.8112(2)
_cell_length_c                         19.3646(4)
_cell_angle_alpha                      90.0000
_cell_angle_beta                       92.4184(11)
_cell_angle_gamma                      90.0000
_cell_volume                           1327.42(4)
_cell_formula_units_Z                  4
_cell_measurement_reflns_used          12496
_cell_measurement_theta_min            4.1
_cell_measurement_theta_max            68.2
_cell_measurement_temperature          296.1

#------------------------------------------------------------------------------

_exptl_crystal_description            'block'
_exptl_crystal_colour                 'colorless'
_exptl_crystal_size_max                0.80
_exptl_crystal_size_mid                0.70
_exptl_crystal_size_min                0.70
_exptl_crystal_density_diffrn          1.292
_exptl_crystal_density_meas            ?
_exptl_crystal_density_method         'not measured'
_exptl_crystal_F_000                   552.00
_exptl_absorpt_coefficient_mu          0.699
_exptl_absorpt_correction_type         multi-scan
_exptl_absorpt_process_details         
;
    Higashi, T. (1995). Program for Absorption Correction.
    Rigaku Corporation, Tokyo, Japan.
;
_exptl_absorpt_correction_T_min        0.529
_exptl_absorpt_correction_T_max        0.613

#==============================================================================

# EXPERIMENTAL DATA

_diffrn_radiation_type                'Cu K\a'
_diffrn_radiation_wavelength           1.54187
_diffrn_measurement_device_type       'Rigaku RAXIS-RAPID'
_diffrn_measurement_method             \w
_diffrn_detector_area_resol_mean       10.00
_diffrn_reflns_number                  13427
_diffrn_reflns_av_R_equivalents        0.032
_diffrn_reflns_theta_max               68.19
_diffrn_measured_fraction_theta_max    0.989
_diffrn_reflns_theta_full              68.19
_diffrn_measured_fraction_theta_full   0.989
_diffrn_reflns_limit_h_min             -7
_diffrn_reflns_limit_h_max             7
_diffrn_reflns_limit_k_min             -13
_diffrn_reflns_limit_k_max             12
_diffrn_reflns_limit_l_min             -23
_diffrn_reflns_limit_l_max             23

#==============================================================================

# REFINEMENT DATA

_refine_special_details
;
    Refinement using all reflections. The weighted 
    R-factor (wR) and goodness of fit (S) are based on F^2^.
    R-factor (gt) are based on F. The threshold expression of
    F^2^ > 2.0 sigma(F^2^) is used only for calculating R-factor (gt).
;
_reflns_number_total                   2402
_reflns_number_gt                      1803
_reflns_threshold_expression           F^2^>2.0\s(F^2^)
_refine_ls_structure_factor_coef       Fsqd
_refine_ls_R_factor_gt                 0.0532
_refine_ls_wR_factor_ref               0.1374
_refine_ls_hydrogen_treatment          refall
_refine_ls_number_reflns               2402
_refine_ls_number_parameters           190
_refine_ls_goodness_of_fit_ref         1.000
_refine_ls_weighting_scheme            calc
_refine_ls_weighting_details
'w = 1/[0.0019Fo^2^ + 1.0000\s(Fo^2^)]/(4Fo^2^)'
_refine_ls_shift/su_max                0.0000
_refine_diff_density_max               0.22
_refine_diff_density_min               -0.34
_refine_ls_extinction_method           none
_refine_ls_extinction_coef             ?

loop_
_atom_type_symbol
_atom_type_description
_atom_type_scat_dispersion_real
_atom_type_scat_dispersion_imag
_atom_type_scat_source
  'C' 'C'  0.018 0.009 
;
International Tables for Crystallography
(1992, Vol. C, Tables 4.2.6.8 and 6.1.1.4)
;
  'H' 'H'  0.000 0.000 
;
International Tables for Crystallography
(1992, Vol. C, Table 6.1.1.4)
;
  'O' 'O'  0.049 0.032 
;
International Tables for Crystallography
(1992, Vol. C, Tables 4.2.6.8 and 6.1.1.4)
;
  'N' 'N'  0.031 0.018 
;
International Tables for Crystallography
(1992, Vol. C, Tables 4.2.6.8 and 6.1.1.4)
;

#==============================================================================

# ATOMIC COORDINATES AND THERMAL PARAMETERS

loop_
_atom_site_label
_atom_site_type_symbol
_atom_site_fract_x
_atom_site_fract_y
_atom_site_fract_z
_atom_site_U_iso_or_equiv
_atom_site_adp_type
_atom_site_occupancy
_atom_site_symmetry_multiplicity
_atom_site_calc_flag
_atom_site_refinement_flags
_atom_site_disorder_assembly
_atom_site_disorder_group
 O(1) O 0.0626(2) 0.09375(14) -0.13216(6) 0.0718(4) Uani 1.00 1 d . . .
 O(2) O 0.3294(2) 0.03759(13) -0.06068(6) 0.0648(4) Uani 1.00 1 d . . .
 N(1) N 0.2902(2) 0.12806(14) 0.07412(8) 0.0540(4) Uani 1.00 1 d . . .
 N(3) N 0.2238(2) 0.34444(14) 0.18272(8) 0.0540(4) Uani 1.00 1 d . . .
 C(5) C 0.0457(2) 0.16174(14) -0.02027(9) 0.0436(4) Uani 1.00 1 d . . .
 C(6) C 0.1092(2) 0.17632(14) 0.04745(8) 0.0416(4) Uani 1.00 1 d . . .
 C(7) C 0.1635(2) 0.09323(17) -0.06867(9) 0.0512(5) Uani 1.00 1 d . . .
 C(8) C -0.0234(2) 0.24951(16) 0.09526(8) 0.0431(4) Uani 1.00 1 d . . .
 C(9) C -0.0885(2) 0.46097(14) 0.14239(9) 0.0436(4) Uani 1.00 1 d . . .
 C(10) C 0.0812(2) 0.36994(16) 0.12292(8) 0.0431(4) Uani 1.00 1 d . . .
 C(11) C -0.1522(2) 0.47373(18) 0.20971(9) 0.0513(4) Uani 1.00 1 d . . .
 C(12) C 0.3663(2) 0.14249(19) 0.14524(9) 0.0549(5) Uani 1.00 1 d . . .
 C(13) C 0.4143(2) 0.2754(2) 0.16599(10) 0.0600(5) Uani 1.00 1 d . . .
 C(14) C -0.1903(3) 0.53141(19) 0.09101(10) 0.0598(5) Uani 1.00 1 d . . .
 C(15) C -0.1542(2) 0.20828(19) -0.05607(10) 0.0556(5) Uani 1.00 1 d . . .
 C(16) C -0.3113(3) 0.5553(2) 0.22498(11) 0.0634(6) Uani 1.00 1 d . . .
 C(17) C -0.4092(3) 0.6255(2) 0.17398(13) 0.0694(6) Uani 1.00 1 d . . .
 C(18) C -0.1194(3) 0.1744(2) -0.13166(11) 0.0737(7) Uani 1.00 1 d . . .
 C(19) C -0.3493(3) 0.6133(2) 0.10637(12) 0.0739(7) Uani 1.00 1 d . . .
 H(1) H -0.4169 0.6666 0.0632 0.089 Uiso 1.00 1 c R . .
 H(2) H -0.1273 0.5249 0.0416 0.072 Uiso 1.00 1 c R . .
 H(3) H -0.5221 0.6969 0.1934 0.084 Uiso 1.00 1 c R . .
 H(4) H -0.3663 0.5582 0.2712 0.076 Uiso 1.00 1 c R . .
 H(5) H -0.0980 0.4147 0.2497 0.062 Uiso 1.00 1 c R . .
 H(6) H -0.0431 0.1982 0.1335 0.052 Uiso 1.00 1 c R . .
 H(7) H -0.1521 0.2652 0.0715 0.051 Uiso 1.00 1 c R . .
 H(8) H 0.1662 0.4069 0.0827 0.052 Uiso 1.00 1 c R . .
 H(9) H 0.2833 0.4300 0.2018 0.065 Uiso 1.00 1 c R . .
 H(10) H 0.5070 0.2746 0.2058 0.072 Uiso 1.00 1 c R . .
 H(11) H 0.4930 0.3226 0.1228 0.072 Uiso 1.00 1 c R . .
 H(12) H 0.4793 0.0956 0.1503 0.065 Uiso 1.00 1 c R . .
 H(13) H 0.2563 0.1086 0.1813 0.066 Uiso 1.00 1 c R . .
 H(14) H 0.3724 0.0777 0.0457 0.065 Uiso 1.00 1 c R . .
 H(15) H -0.2983 0.1581 -0.0399 0.066 Uiso 1.00 1 c R . .
 H(16) H -0.1623 0.3041 -0.0529 0.066 Uiso 1.00 1 c R . .
 H(17) H -0.0766 0.2708 -0.1582 0.088 Uiso 1.00 1 c R . .
 H(18) H -0.2556 0.1208 -0.1512 0.088 Uiso 1.00 1 c R . .


loop_
_atom_site_aniso_label
_atom_site_aniso_U_11
_atom_site_aniso_U_22
_atom_site_aniso_U_33
_atom_site_aniso_U_12
_atom_site_aniso_U_13
_atom_site_aniso_U_23
 O(1) 0.0846(10) 0.0808(10) 0.0491(7) 0.0244(8) -0.0078(6) -0.0188(7)
 O(2) 0.0598(8) 0.0739(9) 0.0611(8) 0.0255(7) 0.0057(6) -0.0125(6)
 N(1) 0.0494(8) 0.0664(9) 0.0458(8) 0.0229(7) -0.0016(6) -0.0081(7)
 N(3) 0.0478(8) 0.0606(9) 0.0528(8) 0.0103(7) -0.0065(6) -0.0129(7)
 C(5) 0.0430(8) 0.0424(8) 0.0453(9) 0.0071(6) -0.0006(7) -0.0037(7)
 C(6) 0.0395(8) 0.0406(8) 0.0450(8) 0.0046(6) 0.0043(6) -0.0010(6)
 C(7) 0.0566(11) 0.0502(9) 0.0468(9) 0.0072(8) 0.0001(7) -0.0057(8)
 C(8) 0.0389(8) 0.0476(9) 0.0430(8) 0.0052(7) 0.0040(6) -0.0022(7)
 C(9) 0.0453(8) 0.0388(8) 0.0469(9) -0.0003(6) 0.0058(7) -0.0013(7)
 C(10) 0.0410(8) 0.0465(9) 0.0422(8) 0.0027(7) 0.0060(6) -0.0000(7)
 C(11) 0.0571(10) 0.0530(10) 0.0440(9) 0.0056(8) 0.0044(7) -0.0081(7)
 C(12) 0.0531(10) 0.0653(11) 0.0458(9) 0.0219(8) -0.0045(7) -0.0009(8)
 C(13) 0.0429(9) 0.0738(13) 0.0625(11) 0.0102(9) -0.0078(8) -0.0105(10)
 C(14) 0.0621(11) 0.0626(12) 0.0555(11) 0.0140(9) 0.0115(8) 0.0150(9)
 C(15) 0.0539(10) 0.0555(10) 0.0563(10) 0.0122(8) -0.0113(8) -0.0082(8)
 C(16) 0.0634(11) 0.0649(12) 0.0625(12) 0.0079(9) 0.0115(9) -0.0177(10)
 C(17) 0.0601(12) 0.0544(11) 0.0948(16) 0.0143(9) 0.0152(11) -0.0071(11)
 C(18) 0.0824(15) 0.0777(14) 0.0589(12) 0.0267(12) -0.0221(10) -0.0159(10)
 C(19) 0.0674(13) 0.0675(13) 0.0869(16) 0.0200(11) 0.0072(11) 0.0242(11)

#==============================================================================

_computing_data_collection            'PROCESS-AUTO'
_computing_cell_refinement            'PROCESS-AUTO'
_computing_data_reduction             'CrystalStructure'
_computing_structure_solution         'SIR92'
_computing_structure_refinement       'CRYSTALS'
_computing_publication_material       'CrystalStructure 3.7.0'
_computing_molecular_graphics          ?

#==============================================================================

# MOLECULAR GEOMETRY

_geom_special_details
;
    ENTER SPECIAL DETAILS OF THE MOLECULAR GEOMETRY
;

loop_
_geom_bond_atom_site_label_1
_geom_bond_atom_site_label_2
_geom_bond_distance
_geom_bond_publ_flag
_geom_bond_site_symmetry_1
_geom_bond_site_symmetry_2
O(1) C(7) 1.362(2) ? . .
O(1) C(18) 1.447(2) ? . .
O(2) C(7) 1.217(2) ? . .
N(1) C(6) 1.345(2) ? . .
N(1) C(12) 1.448(2) ? . .
N(3) C(10) 1.465(2) ? . .
N(3) C(13) 1.469(2) ? . .
C(5) C(6) 1.365(2) ? . .
C(5) C(7) 1.430(2) ? . .
C(5) C(15) 1.506(2) ? . .
C(6) C(8) 1.502(2) ? . .
C(8) C(10) 1.547(2) ? . .
C(9) C(10) 1.518(2) ? . .
C(9) C(11) 1.388(2) ? . .
C(9) C(14) 1.390(2) ? . .
C(11) C(16) 1.382(2) ? . .
C(12) C(13) 1.519(3) ? . .
C(14) C(19) 1.384(3) ? . .
C(15) C(18) 1.534(2) ? . .
C(16) C(17) 1.373(3) ? . .
C(17) C(19) 1.385(3) ? . .
N(1) H(14) 0.946 ? . .
N(3) H(9) 1.060 ? . .
C(8) H(6) 0.938 ? . .
C(8) H(7) 0.936 ? . .
C(10) H(8) 1.045 ? . .
C(11) H(5) 1.051 ? . .
C(12) H(12) 0.880 ? . .
C(12) H(13) 1.072 ? . .
C(13) H(10) 0.951 ? . .
C(13) H(11) 1.115 ? . .
C(14) H(2) 1.054 ? . .
C(15) H(15) 1.120 ? . .
C(15) H(16) 1.039 ? . .
C(16) H(4) 0.975 ? . .
C(17) H(3) 1.128 ? . .
C(18) H(17) 1.198 ? . .
C(18) H(18) 1.094 ? . .
C(19) H(1) 1.088 ? . .

loop_
_geom_angle_atom_site_label_1
_geom_angle_atom_site_label_2
_geom_angle_atom_site_label_3
_geom_angle
_geom_angle_publ_flag
_geom_angle_site_symmetry_1
_geom_angle_site_symmetry_2
_geom_angle_site_symmetry_3
C(7) O(1) C(18) 109.95(15) ? . . .
C(6) N(1) C(12) 124.64(15) ? . . .
C(10) N(3) C(13) 114.07(14) ? . . .
C(6) C(5) C(7) 123.27(15) ? . . .
C(6) C(5) C(15) 127.76(15) ? . . .
C(7) C(5) C(15) 108.95(15) ? . . .
N(1) C(6) C(5) 122.47(15) ? . . .
N(1) C(6) C(8) 117.35(13) ? . . .
C(5) C(6) C(8) 120.18(14) ? . . .
O(1) C(7) O(2) 119.21(16) ? . . .
O(1) C(7) C(5) 110.54(15) ? . . .
O(2) C(7) C(5) 130.25(16) ? . . .
C(6) C(8) C(10) 114.40(13) ? . . .
C(10) C(9) C(11) 122.39(15) ? . . .
C(10) C(9) C(14) 119.38(15) ? . . .
C(11) C(9) C(14) 118.19(16) ? . . .
N(3) C(10) C(8) 110.92(13) ? . . .
N(3) C(10) C(9) 110.27(13) ? . . .
C(8) C(10) C(9) 109.44(13) ? . . .
C(9) C(11) C(16) 120.60(17) ? . . .
N(1) C(12) C(13) 114.10(15) ? . . .
N(3) C(13) C(12) 112.44(15) ? . . .
C(9) C(14) C(19) 121.17(18) ? . . .
C(5) C(15) C(18) 101.94(16) ? . . .
C(11) C(16) C(17) 120.8(2) ? . . .
C(16) C(17) C(19) 119.5(2) ? . . .
O(1) C(18) C(15) 107.30(16) ? . . .
C(14) C(19) C(17) 119.7(2) ? . . .
C(6) N(1) H(14) 118.9 ? . . .
C(12) N(1) H(14) 116.4 ? . . .
C(10) N(3) H(9) 108.0 ? . . .
C(13) N(3) H(9) 103.7 ? . . .
C(6) C(8) H(6) 105.8 ? . . .
C(6) C(8) H(7) 107.0 ? . . .
C(10) C(8) H(6) 107.1 ? . . .
C(10) C(8) H(7) 111.8 ? . . .
H(6) C(8) H(7) 110.7 ? . . .
N(3) C(10) H(8) 109.9 ? . . .
C(8) C(10) H(8) 106.9 ? . . .
C(9) C(10) H(8) 109.3 ? . . .
C(9) C(11) H(5) 122.2 ? . . .
C(16) C(11) H(5) 116.7 ? . . .
N(1) C(12) H(12) 106.3 ? . . .
N(1) C(12) H(13) 112.4 ? . . .
C(13) C(12) H(12) 111.3 ? . . .
C(13) C(12) H(13) 106.3 ? . . .
H(12) C(12) H(13) 106.3 ? . . .
N(3) C(13) H(10) 108.2 ? . . .
N(3) C(13) H(11) 109.3 ? . . .
C(12) C(13) H(10) 108.5 ? . . .
C(12) C(13) H(11) 109.0 ? . . .
H(10) C(13) H(11) 109.3 ? . . .
C(9) C(14) H(2) 115.5 ? . . .
C(19) C(14) H(2) 123.0 ? . . .
C(5) C(15) H(15) 113.0 ? . . .
C(5) C(15) H(16) 110.4 ? . . .
C(18) C(15) H(15) 107.7 ? . . .
C(18) C(15) H(16) 107.7 ? . . .
H(15) C(15) H(16) 115.1 ? . . .
C(11) C(16) H(4) 120.7 ? . . .
C(17) C(16) H(4) 118.3 ? . . .
C(16) C(17) H(3) 114.4 ? . . .
C(19) C(17) H(3) 125.7 ? . . .
O(1) C(18) H(17) 109.0 ? . . .
O(1) C(18) H(18) 107.3 ? . . .
C(15) C(18) H(17) 104.2 ? . . .
C(15) C(18) H(18) 108.2 ? . . .
H(17) C(18) H(18) 120.2 ? . . .
C(14) C(19) H(1) 116.2 ? . . .
C(17) C(19) H(1) 124.1 ? . . .

loop_
_geom_torsion_atom_site_label_1
_geom_torsion_atom_site_label_2
_geom_torsion_atom_site_label_3
_geom_torsion_atom_site_label_4
_geom_torsion
_geom_torsion_publ_flag
_geom_torsion_site_symmetry_1
_geom_torsion_site_symmetry_2
_geom_torsion_site_symmetry_3
_geom_torsion_site_symmetry_4
C(7) O(1) C(18) C(15) -11.1(2) ? . . . .
C(18) O(1) C(7) O(2) -174.62(18) ? . . . .
C(18) O(1) C(7) C(5) 6.0(2) ? . . . .
C(6) N(1) C(12) C(13) -63.2(2) ? . . . .
C(12) N(1) C(6) C(5) 178.96(16) ? . . . .
C(12) N(1) C(6) C(8) -0.5(2) ? . . . .
C(10) N(3) C(13) C(12) -69.40(19) ? . . . .
C(13) N(3) C(10) C(8) 69.08(18) ? . . . .
C(13) N(3) C(10) C(9) -169.52(14) ? . . . .
C(6) C(5) C(7) O(1) 179.78(16) ? . . . .
C(6) C(5) C(7) O(2) 0.5(3) ? . . . .
C(7) C(5) C(6) N(1) 0.7(2) ? . . . .
C(7) C(5) C(6) C(8) -179.88(15) ? . . . .
C(6) C(5) C(15) C(18) 174.09(18) ? . . . .
C(15) C(5) C(6) N(1) 178.55(17) ? . . . .
C(15) C(5) C(6) C(8) -2.1(2) ? . . . .
C(7) C(5) C(15) C(18) -7.8(2) ? . . . .
C(15) C(5) C(7) O(1) 1.6(2) ? . . . .
C(15) C(5) C(7) O(2) -177.66(19) ? . . . .
N(1) C(6) C(8) C(10) 64.87(19) ? . . . .
C(5) C(6) C(8) C(10) -114.56(16) ? . . . .
C(6) C(8) C(10) N(3) -83.06(16) ? . . . .
C(6) C(8) C(10) C(9) 155.05(13) ? . . . .
C(10) C(9) C(11) C(16) -178.21(17) ? . . . .
C(11) C(9) C(10) N(3) -25.6(2) ? . . . .
C(11) C(9) C(10) C(8) 96.67(18) ? . . . .
C(10) C(9) C(14) C(19) 178.44(18) ? . . . .
C(14) C(9) C(10) N(3) 156.82(15) ? . . . .
C(14) C(9) C(10) C(8) -80.90(19) ? . . . .
C(11) C(9) C(14) C(19) 0.8(2) ? . . . .
C(14) C(9) C(11) C(16) -0.6(2) ? . . . .
C(9) C(11) C(16) C(17) -0.2(3) ? . . . .
N(1) C(12) C(13) N(3) 80.74(19) ? . . . .
C(9) C(14) C(19) C(17) -0.2(3) ? . . . .
C(5) C(15) C(18) O(1) 11.1(2) ? . . . .
C(11) C(16) C(17) C(19) 0.8(3) ? . . . .
C(16) C(17) C(19) C(14) -0.6(3) ? . . . .

loop_
_geom_contact_atom_site_label_1
_geom_contact_atom_site_label_2
_geom_contact_distance
_geom_contact_publ_flag
_geom_contact_site_symmetry_1
_geom_contact_site_symmetry_2
O(1) O(2) 2.2254(19) ? . .
O(1) N(1) 3.499(2) ? . 55503
O(1) C(5) 2.295(2) ? . .
O(1) C(6) 3.591(2) ? . .
O(1) C(6) 3.543(2) ? . 55503
O(1) C(15) 2.402(2) ? . .
O(1) C(16) 3.328(2) ? . 55404
O(2) O(1) 2.2254(19) ? . .
O(2) O(2) 3.2317(18) ? . 65503
O(2) N(1) 2.808(2) ? . .
O(2) N(1) 3.026(2) ? . 65503
O(2) C(5) 2.403(2) ? . .
O(2) C(6) 2.972(2) ? . .
O(2) C(12) 3.235(2) ? . 65503
O(2) C(15) 3.585(2) ? . .
O(2) C(18) 3.443(2) ? . .
N(1) O(1) 3.499(2) ? . 55503
N(1) O(2) 2.808(2) ? . .
N(1) O(2) 3.026(2) ? . 65503
N(1) N(3) 3.186(2) ? . .
N(1) C(5) 2.375(2) ? . .
N(1) C(7) 2.872(2) ? . .
N(1) C(8) 2.434(2) ? . .
N(1) C(10) 3.098(2) ? . .
N(1) C(13) 2.490(2) ? . .
N(3) N(1) 3.186(2) ? . .
N(3) C(6) 3.245(2) ? . .
N(3) C(8) 2.482(2) ? . .
N(3) C(9) 2.448(2) ? . .
N(3) C(11) 2.833(2) ? . .
N(3) C(12) 2.483(2) ? . .
C(5) O(1) 2.295(2) ? . .
C(5) O(2) 2.403(2) ? . .
C(5) N(1) 2.375(2) ? . .
C(5) C(7) 3.539(2) ? . 55503
C(5) C(8) 2.486(2) ? . .
C(5) C(10) 3.571(2) ? . .
C(5) C(18) 2.362(2) ? . .
C(5) C(19) 3.561(2) ? . 56503
C(6) O(1) 3.591(2) ? . .
C(6) O(1) 3.543(2) ? . 55503
C(6) O(2) 2.972(2) ? . .
C(6) N(3) 3.245(2) ? . .
C(6) C(7) 2.459(2) ? . .
C(6) C(7) 3.423(2) ? . 55503
C(6) C(10) 2.563(2) ? . .
C(6) C(12) 2.474(2) ? . .
C(6) C(13) 3.129(2) ? . .
C(6) C(15) 2.579(2) ? . .
C(7) N(1) 2.872(2) ? . .
C(7) C(5) 3.539(2) ? . 55503
C(7) C(6) 2.459(2) ? . .
C(7) C(6) 3.423(2) ? . 55503
C(7) C(15) 2.390(2) ? . .
C(7) C(18) 2.301(2) ? . .
C(7) C(19) 3.473(2) ? . 56503
C(8) N(1) 2.434(2) ? . .
C(8) N(3) 2.482(2) ? . .
C(8) C(5) 2.486(2) ? . .
C(8) C(9) 2.502(2) ? . .
C(8) C(11) 3.407(2) ? . .
C(8) C(12) 2.862(2) ? . .
C(8) C(13) 3.057(2) ? . .
C(8) C(14) 3.226(2) ? . .
C(8) C(15) 3.045(2) ? . .
C(9) N(3) 2.448(2) ? . .
C(9) C(8) 2.502(2) ? . .
C(9) C(16) 2.406(2) ? . .
C(9) C(17) 2.791(2) ? . .
C(9) C(19) 2.417(2) ? . .
C(10) N(1) 3.098(2) ? . .
C(10) C(5) 3.571(2) ? . .
C(10) C(6) 2.563(2) ? . .
C(10) C(11) 2.547(2) ? . .
C(10) C(12) 3.073(2) ? . .
C(10) C(13) 2.461(2) ? . .
C(10) C(14) 2.512(2) ? . .
C(11) N(3) 2.833(2) ? . .
C(11) C(8) 3.407(2) ? . .
C(11) C(10) 2.547(2) ? . .
C(11) C(13) 3.562(2) ? . 45501
C(11) C(14) 2.384(2) ? . .
C(11) C(17) 2.395(2) ? . .
C(11) C(19) 2.763(2) ? . .
C(12) O(2) 3.235(2) ? . 65503
C(12) N(3) 2.483(2) ? . .
C(12) C(6) 2.474(2) ? . .
C(12) C(8) 2.862(2) ? . .
C(12) C(10) 3.073(2) ? . .
C(13) N(1) 2.490(2) ? . .
C(13) C(6) 3.129(2) ? . .
C(13) C(8) 3.057(2) ? . .
C(13) C(10) 2.461(2) ? . .
C(13) C(11) 3.562(2) ? . 65501
C(14) C(8) 3.226(2) ? . .
C(14) C(10) 2.512(2) ? . .
C(14) C(11) 2.384(2) ? . .
C(14) C(16) 2.749(2) ? . .
C(14) C(17) 2.395(3) ? . .
C(15) O(1) 2.402(2) ? . .
C(15) O(2) 3.585(2) ? . .
C(15) C(6) 2.579(2) ? . .
C(15) C(7) 2.390(2) ? . .
C(15) C(8) 3.045(2) ? . .
C(16) O(1) 3.328(2) ? . 45504
C(16) C(9) 2.406(2) ? . .
C(16) C(14) 2.749(2) ? . .
C(16) C(19) 2.383(3) ? . .
C(17) C(9) 2.791(2) ? . .
C(17) C(11) 2.395(2) ? . .
C(17) C(14) 2.395(3) ? . .
C(18) O(2) 3.443(2) ? . .
C(18) C(5) 2.362(2) ? . .
C(18) C(7) 2.301(2) ? . .
C(19) C(5) 3.561(2) ? . 56503
C(19) C(7) 3.473(2) ? . 56503
C(19) C(9) 2.417(2) ? . .
C(19) C(11) 2.763(2) ? . .
C(19) C(16) 2.383(3) ? . .
O(1) H(4) 2.544 ? . 55404
O(1) H(5) 3.208 ? . 55404
O(1) H(6) 3.159 ? . 55503
O(1) H(10) 3.449 ? . 45404
O(1) H(12) 3.584 ? . 65503
O(1) H(13) 3.102 ? . 55503
O(1) H(15) 3.045 ? . .
O(1) H(16) 3.122 ? . .
O(1) H(17) 2.159 ? . .
O(1) H(18) 2.058 ? . .
O(2) H(1) 3.247 ? . 56503
O(2) H(4) 3.587 ? . 55404
O(2) H(6) 3.402 ? . 55503
O(2) H(7) 3.465 ? . 55503
O(2) H(12) 2.595 ? . 65503
O(2) H(14) 2.112 ? . .
O(2) H(14) 2.274 ? . 65503
O(2) H(15) 2.713 ? . 65501
O(2) H(15) 2.887 ? . 55503
O(2) H(18) 3.348 ? . 65501
N(1) H(1) 3.582 ? . 56503
N(1) H(6) 2.565 ? . .
N(1) H(7) 3.173 ? . .
N(1) H(8) 3.122 ? . .
N(1) H(10) 3.258 ? . .
N(1) H(11) 2.620 ? . .
N(1) H(12) 1.894 ? . .
N(1) H(13) 2.105 ? . .
N(1) H(15) 3.505 ? . 65501
N(1) H(15) 3.164 ? . 55503
N(1) H(18) 3.089 ? . 55503
N(3) H(3) 3.194 ? . 44502
N(3) H(5) 2.580 ? . .
N(3) H(6) 2.478 ? . .
N(3) H(7) 3.260 ? . .
N(3) H(8) 2.069 ? . .
N(3) H(10) 1.983 ? . .
N(3) H(11) 2.118 ? . .
N(3) H(12) 3.217 ? . .
N(3) H(13) 2.559 ? . .
N(3) H(17) 3.510 ? . 55504
N(3) H(18) 3.236 ? . 55504
C(5) H(1) 3.138 ? . 56503
C(5) H(2) 3.454 ? . 56503
C(5) H(6) 3.079 ? . .
C(5) H(7) 2.485 ? . .
C(5) H(8) 3.385 ? . .
C(5) H(14) 2.556 ? . .
C(5) H(15) 2.201 ? . .
C(5) H(16) 2.107 ? . .
C(5) H(17) 2.991 ? . .
C(5) H(18) 3.141 ? . .
C(6) H(1) 3.412 ? . 56503
C(6) H(6) 1.976 ? . .
C(6) H(7) 1.989 ? . .
C(6) H(8) 2.606 ? . .
C(6) H(11) 3.204 ? . .
C(6) H(12) 3.138 ? . .
C(6) H(13) 2.814 ? . .
C(6) H(14) 1.983 ? . .
C(6) H(15) 3.036 ? . .
C(6) H(16) 2.893 ? . .
C(7) H(1) 3.053 ? . 56503
C(7) H(4) 3.504 ? . 55404
C(7) H(6) 3.465 ? . 55503
C(7) H(12) 3.479 ? . 65503
C(7) H(14) 2.538 ? . .
C(7) H(14) 3.489 ? . 65503
C(7) H(15) 3.087 ? . .
C(7) H(15) 3.508 ? . 65501
C(7) H(15) 3.518 ? . 55503
C(7) H(16) 3.101 ? . .
C(7) H(17) 2.964 ? . .
C(7) H(18) 3.059 ? . .
C(8) H(2) 3.213 ? . .
C(8) H(4) 3.407 ? . 44502
C(8) H(5) 3.533 ? . .
C(8) H(8) 2.104 ? . .
C(8) H(9) 3.393 ? . .
C(8) H(11) 3.235 ? . 45501
C(8) H(11) 3.391 ? . .
C(8) H(13) 2.828 ? . .
C(8) H(14) 3.299 ? . .
C(8) H(15) 3.238 ? . .
C(8) H(16) 3.023 ? . .
C(9) H(1) 3.371 ? . .
C(9) H(2) 2.075 ? . .
C(9) H(4) 3.287 ? . .
C(9) H(5) 2.141 ? . .
C(9) H(6) 2.861 ? . .
C(9) H(7) 2.546 ? . .
C(9) H(8) 2.108 ? . .
C(9) H(9) 2.602 ? . .
C(9) H(10) 3.525 ? . 45501
C(9) H(11) 3.058 ? . 45501
C(9) H(16) 3.496 ? . 56503
C(9) H(17) 3.094 ? . 56503
C(10) H(2) 2.620 ? . .
C(10) H(2) 3.407 ? . 56503
C(10) H(5) 2.792 ? . .
C(10) H(6) 2.031 ? . .
C(10) H(7) 2.084 ? . .
C(10) H(9) 2.057 ? . .
C(10) H(10) 3.252 ? . .
C(10) H(11) 2.663 ? . .
C(10) H(13) 3.223 ? . .
C(11) H(2) 3.312 ? . .
C(11) H(3) 3.372 ? . .
C(11) H(4) 2.058 ? . .
C(11) H(6) 3.408 ? . .
C(11) H(7) 3.499 ? . .
C(11) H(8) 3.327 ? . .
C(11) H(9) 2.814 ? . .
C(11) H(10) 3.050 ? . 45501
C(11) H(11) 3.201 ? . 45501
C(11) H(12) 3.169 ? . 55502
C(11) H(13) 3.528 ? . 55502
C(11) H(17) 3.295 ? . 56503
C(12) H(5) 3.480 ? . 54502
C(12) H(6) 2.667 ? . .
C(12) H(8) 3.334 ? . .
C(12) H(9) 3.345 ? . .
C(12) H(10) 2.031 ? . .
C(12) H(11) 2.158 ? . .
C(12) H(14) 2.053 ? . .
C(12) H(18) 2.935 ? . 55503
C(13) H(6) 3.060 ? . .
C(13) H(7) 3.370 ? . 65501
C(13) H(8) 2.624 ? . .
C(13) H(9) 2.004 ? . .
C(13) H(12) 2.013 ? . .
C(13) H(13) 2.090 ? . .
C(13) H(14) 3.164 ? . .
C(13) H(17) 3.440 ? . 55504
C(14) H(1) 2.104 ? . .
C(14) H(2) 3.387 ? . 56503
C(14) H(3) 3.452 ? . .
C(14) H(5) 3.351 ? . .
C(14) H(7) 2.914 ? . .
C(14) H(8) 2.643 ? . .
C(14) H(8) 3.440 ? . 56503
C(14) H(11) 3.102 ? . 45501
C(14) H(16) 2.976 ? . 56503
C(14) H(17) 2.991 ? . 56503
C(15) H(1) 3.038 ? . 46503
C(15) H(2) 3.398 ? . 56503
C(15) H(3) 3.447 ? . 46503
C(15) H(7) 2.545 ? . .
C(15) H(14) 3.397 ? . 55503
C(15) H(17) 2.166 ? . .
C(15) H(18) 2.145 ? . .
C(16) H(1) 3.396 ? . .
C(16) H(3) 2.107 ? . .
C(16) H(5) 2.078 ? . .
C(16) H(6) 3.311 ? . 45502
C(16) H(9) 2.925 ? . 45501
C(16) H(10) 3.261 ? . 45501
C(16) H(10) 3.306 ? . 55502
C(16) H(11) 3.402 ? . 45501
C(16) H(12) 3.168 ? . 55502
C(16) H(13) 3.469 ? . 45502
C(16) H(17) 3.397 ? . 56503
C(17) H(1) 2.189 ? . .
C(17) H(2) 3.367 ? . .
C(17) H(4) 2.026 ? . .
C(17) H(5) 3.317 ? . .
C(17) H(5) 3.458 ? . 45502
C(17) H(9) 2.942 ? . 45501
C(17) H(11) 3.470 ? . 45501
C(17) H(16) 3.597 ? . 46503
C(17) H(17) 3.452 ? . 46503
C(17) H(17) 3.307 ? . 56503
C(17) H(18) 3.488 ? . 46503
C(18) H(3) 2.883 ? . 46503
C(18) H(4) 3.563 ? . 55404
C(18) H(9) 3.449 ? . 45404
C(18) H(10) 3.326 ? . 45404
C(18) H(13) 3.311 ? . 55503
C(18) H(15) 2.156 ? . .
C(18) H(16) 2.098 ? . .
C(19) H(2) 2.149 ? . .
C(19) H(3) 2.239 ? . .
C(19) H(4) 3.253 ? . .
C(19) H(11) 3.317 ? . 45501
C(19) H(15) 3.539 ? . 46503
C(19) H(16) 3.348 ? . 46503
C(19) H(16) 3.563 ? . 56503
C(19) H(17) 3.107 ? . 56503
H(1) O(2) 3.247 ? . 56503
H(1) N(1) 3.582 ? . 56503
H(1) C(5) 3.138 ? . 56503
H(1) C(6) 3.412 ? . 56503
H(1) C(7) 3.053 ? . 56503
H(1) C(9) 3.371 ? . .
H(1) C(14) 2.104 ? . .
H(1) C(15) 3.038 ? . 46503
H(1) C(16) 3.396 ? . .
H(1) C(17) 2.189 ? . .
H(1) H(2) 2.442 ? . .
H(1) H(3) 2.654 ? . .
H(1) H(8) 3.396 ? . 56503
H(1) H(14) 3.496 ? . 56503
H(1) H(15) 2.645 ? . 46503
H(1) H(16) 2.689 ? . 46503
H(1) H(18) 3.578 ? . 46503
H(2) C(5) 3.454 ? . 56503
H(2) C(8) 3.213 ? . .
H(2) C(9) 2.075 ? . .
H(2) C(10) 2.620 ? . .
H(2) C(10) 3.407 ? . 56503
H(2) C(11) 3.312 ? . .
H(2) C(14) 3.387 ? . 56503
H(2) C(15) 3.398 ? . 56503
H(2) C(17) 3.367 ? . .
H(2) C(19) 2.149 ? . .
H(2) H(1) 2.442 ? . .
H(2) H(2) 2.392 ? . 56503
H(2) H(7) 2.873 ? . .
H(2) H(8) 2.368 ? . .
H(2) H(8) 2.521 ? . 56503
H(2) H(16) 3.011 ? . .
H(2) H(16) 2.610 ? . 56503
H(2) H(17) 3.376 ? . 56503
H(3) N(3) 3.194 ? . 45502
H(3) C(11) 3.372 ? . .
H(3) C(14) 3.452 ? . .
H(3) C(15) 3.447 ? . 46503
H(3) C(16) 2.107 ? . .
H(3) C(18) 2.883 ? . 46503
H(3) C(19) 2.239 ? . .
H(3) H(1) 2.654 ? . .
H(3) H(4) 2.318 ? . .
H(3) H(5) 2.696 ? . 45502
H(3) H(6) 3.361 ? . 45502
H(3) H(9) 3.146 ? . 45501
H(3) H(13) 3.053 ? . 45502
H(3) H(15) 3.508 ? . 46503
H(3) H(16) 3.309 ? . 46503
H(3) H(17) 2.632 ? . 46503
H(3) H(18) 2.539 ? . 46503
H(4) O(1) 2.544 ? . 45504
H(4) O(2) 3.587 ? . 45504
H(4) C(7) 3.504 ? . 45504
H(4) C(8) 3.407 ? . 45502
H(4) C(9) 3.287 ? . .
H(4) C(11) 2.058 ? . .
H(4) C(17) 2.026 ? . .
H(4) C(18) 3.563 ? . 45504
H(4) C(19) 3.253 ? . .
H(4) H(3) 2.318 ? . .
H(4) H(5) 2.353 ? . .
H(4) H(6) 2.473 ? . 45502
H(4) H(9) 2.902 ? . 45501
H(4) H(10) 3.400 ? . 45501
H(4) H(10) 3.284 ? . 55502
H(4) H(12) 2.862 ? . 55502
H(4) H(13) 2.732 ? . 45502
H(4) H(18) 3.524 ? . 45504
H(5) O(1) 3.208 ? . 45504
H(5) N(3) 2.580 ? . .
H(5) C(8) 3.533 ? . .
H(5) C(9) 2.141 ? . .
H(5) C(10) 2.792 ? . .
H(5) C(12) 3.480 ? . 55502
H(5) C(14) 3.351 ? . .
H(5) C(16) 2.078 ? . .
H(5) C(17) 3.317 ? . .
H(5) C(17) 3.458 ? . 44502
H(5) H(3) 2.696 ? . 44502
H(5) H(4) 2.353 ? . .
H(5) H(6) 3.276 ? . .
H(5) H(9) 2.633 ? . .
H(5) H(10) 3.021 ? . 45501
H(5) H(12) 2.831 ? . 55502
H(5) H(13) 3.261 ? . 55502
H(5) H(18) 2.863 ? . 55504
H(6) O(1) 3.159 ? . 55503
H(6) O(2) 3.402 ? . 55503
H(6) N(1) 2.565 ? . .
H(6) N(3) 2.478 ? . .
H(6) C(5) 3.079 ? . .
H(6) C(6) 1.976 ? . .
H(6) C(7) 3.465 ? . 55503
H(6) C(9) 2.861 ? . .
H(6) C(10) 2.031 ? . .
H(6) C(11) 3.408 ? . .
H(6) C(12) 2.667 ? . .
H(6) C(13) 3.060 ? . .
H(6) C(16) 3.311 ? . 44502
H(6) H(3) 3.361 ? . 44502
H(6) H(4) 2.473 ? . 44502
H(6) H(5) 3.276 ? . .
H(6) H(7) 1.541 ? . .
H(6) H(8) 2.816 ? . .
H(6) H(9) 3.477 ? . .
H(6) H(10) 3.337 ? . 45501
H(6) H(11) 3.236 ? . 45501
H(6) H(12) 3.257 ? . 45501
H(6) H(12) 3.498 ? . .
H(6) H(13) 2.293 ? . .
H(6) H(14) 3.452 ? . .
H(7) O(2) 3.465 ? . 55503
H(7) N(1) 3.173 ? . .
H(7) N(3) 3.260 ? . .
H(7) C(5) 2.485 ? . .
H(7) C(6) 1.989 ? . .
H(7) C(9) 2.546 ? . .
H(7) C(10) 2.084 ? . .
H(7) C(11) 3.499 ? . .
H(7) C(13) 3.370 ? . 45501
H(7) C(14) 2.914 ? . .
H(7) C(15) 2.545 ? . .
H(7) H(2) 2.873 ? . .
H(7) H(6) 1.541 ? . .
H(7) H(8) 2.537 ? . .
H(7) H(10) 3.454 ? . 45501
H(7) H(11) 2.576 ? . 45501
H(7) H(12) 3.385 ? . 45501
H(7) H(15) 2.586 ? . .
H(7) H(16) 2.443 ? . .
H(8) N(1) 3.122 ? . .
H(8) N(3) 2.069 ? . .
H(8) C(5) 3.385 ? . .
H(8) C(6) 2.606 ? . .
H(8) C(8) 2.104 ? . .
H(8) C(9) 2.108 ? . .
H(8) C(11) 3.327 ? . .
H(8) C(12) 3.334 ? . .
H(8) C(13) 2.624 ? . .
H(8) C(14) 2.643 ? . .
H(8) C(14) 3.440 ? . 56503
H(8) H(1) 3.396 ? . 56503
H(8) H(2) 2.368 ? . .
H(8) H(2) 2.521 ? . 56503
H(8) H(6) 2.816 ? . .
H(8) H(7) 2.537 ? . .
H(8) H(9) 2.405 ? . .
H(8) H(10) 3.460 ? . .
H(8) H(11) 2.366 ? . .
H(8) H(16) 3.466 ? . .
H(8) H(16) 3.178 ? . 56503
H(9) C(8) 3.393 ? . .
H(9) C(9) 2.602 ? . .
H(9) C(10) 2.057 ? . .
H(9) C(11) 2.814 ? . .
H(9) C(12) 3.345 ? . .
H(9) C(13) 2.004 ? . .
H(9) C(16) 2.925 ? . 65501
H(9) C(17) 2.942 ? . 65501
H(9) C(18) 3.449 ? . 55504
H(9) H(3) 3.146 ? . 65501
H(9) H(4) 2.902 ? . 65501
H(9) H(5) 2.633 ? . .
H(9) H(6) 3.477 ? . .
H(9) H(8) 2.405 ? . .
H(9) H(10) 2.199 ? . .
H(9) H(11) 2.372 ? . .
H(9) H(13) 3.502 ? . .
H(9) H(13) 2.995 ? . 55502
H(9) H(17) 3.578 ? . 56503
H(9) H(17) 3.558 ? . 55504
H(9) H(18) 2.921 ? . 55504
H(10) O(1) 3.449 ? . 55504
H(10) N(1) 3.258 ? . .
H(10) N(3) 1.983 ? . .
H(10) C(9) 3.525 ? . 65501
H(10) C(10) 3.252 ? . .
H(10) C(11) 3.050 ? . 65501
H(10) C(12) 2.031 ? . .
H(10) C(16) 3.261 ? . 65501
H(10) C(16) 3.306 ? . 54502
H(10) C(18) 3.326 ? . 55504
H(10) H(4) 3.400 ? . 65501
H(10) H(4) 3.284 ? . 54502
H(10) H(5) 3.021 ? . 65501
H(10) H(6) 3.337 ? . 65501
H(10) H(7) 3.454 ? . 65501
H(10) H(8) 3.460 ? . .
H(10) H(9) 2.199 ? . .
H(10) H(11) 1.688 ? . .
H(10) H(12) 2.218 ? . .
H(10) H(13) 2.432 ? . .
H(10) H(17) 2.752 ? . 55504
H(10) H(18) 3.480 ? . 55504
H(11) N(1) 2.620 ? . .
H(11) N(3) 2.118 ? . .
H(11) C(6) 3.204 ? . .
H(11) C(8) 3.391 ? . .
H(11) C(8) 3.235 ? . 65501
H(11) C(9) 3.058 ? . 65501
H(11) C(10) 2.663 ? . .
H(11) C(11) 3.201 ? . 65501
H(11) C(12) 2.158 ? . .
H(11) C(14) 3.102 ? . 65501
H(11) C(16) 3.402 ? . 65501
H(11) C(17) 3.470 ? . 65501
H(11) C(19) 3.317 ? . 65501
H(11) H(6) 3.236 ? . 65501
H(11) H(7) 2.576 ? . 65501
H(11) H(8) 2.366 ? . .
H(11) H(9) 2.372 ? . .
H(11) H(10) 1.688 ? . .
H(11) H(12) 2.514 ? . .
H(11) H(13) 3.006 ? . .
H(11) H(14) 3.119 ? . .
H(12) O(1) 3.584 ? . 65503
H(12) O(2) 2.595 ? . 65503
H(12) N(1) 1.894 ? . .
H(12) N(3) 3.217 ? . .
H(12) C(6) 3.138 ? . .
H(12) C(7) 3.479 ? . 65503
H(12) C(11) 3.169 ? . 54502
H(12) C(13) 2.013 ? . .
H(12) C(16) 3.168 ? . 54502
H(12) H(4) 2.862 ? . 54502
H(12) H(5) 2.831 ? . 54502
H(12) H(6) 3.498 ? . .
H(12) H(6) 3.257 ? . 65501
H(12) H(7) 3.385 ? . 65501
H(12) H(10) 2.218 ? . .
H(12) H(11) 2.514 ? . .
H(12) H(13) 1.567 ? . .
H(12) H(14) 2.117 ? . .
H(12) H(18) 2.737 ? . 55503
H(13) O(1) 3.102 ? . 55503
H(13) N(1) 2.105 ? . .
H(13) N(3) 2.559 ? . .
H(13) C(6) 2.814 ? . .
H(13) C(8) 2.828 ? . .
H(13) C(10) 3.223 ? . .
H(13) C(11) 3.528 ? . 54502
H(13) C(13) 2.090 ? . .
H(13) C(16) 3.469 ? . 44502
H(13) C(18) 3.311 ? . 55503
H(13) H(3) 3.053 ? . 44502
H(13) H(4) 2.732 ? . 44502
H(13) H(5) 3.261 ? . 54502
H(13) H(6) 2.293 ? . .
H(13) H(9) 3.502 ? . .
H(13) H(9) 2.995 ? . 54502
H(13) H(10) 2.432 ? . .
H(13) H(11) 3.006 ? . .
H(13) H(12) 1.567 ? . .
H(13) H(14) 2.776 ? . .
H(13) H(17) 3.495 ? . 55504
H(13) H(18) 2.547 ? . 55503
H(14) O(2) 2.112 ? . .
H(14) O(2) 2.274 ? . 65503
H(14) C(5) 2.556 ? . .
H(14) C(6) 1.983 ? . .
H(14) C(7) 2.538 ? . .
H(14) C(7) 3.489 ? . 65503
H(14) C(8) 3.299 ? . .
H(14) C(12) 2.053 ? . .
H(14) C(13) 3.164 ? . .
H(14) C(15) 3.397 ? . 55503
H(14) H(1) 3.496 ? . 56503
H(14) H(6) 3.452 ? . .
H(14) H(11) 3.119 ? . .
H(14) H(12) 2.117 ? . .
H(14) H(13) 2.776 ? . .
H(14) H(14) 2.970 ? . 65503
H(14) H(15) 2.857 ? . 65501
H(14) H(15) 2.593 ? . 55503
H(14) H(18) 3.074 ? . 55503
H(15) O(1) 3.045 ? . .
H(15) O(2) 2.713 ? . 45501
H(15) O(2) 2.887 ? . 55503
H(15) N(1) 3.505 ? . 45501
H(15) N(1) 3.164 ? . 55503
H(15) C(5) 2.201 ? . .
H(15) C(6) 3.036 ? . .
H(15) C(7) 3.508 ? . 45501
H(15) C(7) 3.087 ? . .
H(15) C(7) 3.518 ? . 55503
H(15) C(8) 3.238 ? . .
H(15) C(18) 2.156 ? . .
H(15) C(19) 3.539 ? . 46503
H(15) H(1) 2.645 ? . 46503
H(15) H(3) 3.508 ? . 46503
H(15) H(7) 2.586 ? . .
H(15) H(14) 2.857 ? . 45501
H(15) H(14) 2.593 ? . 55503
H(15) H(16) 1.822 ? . .
H(15) H(17) 2.997 ? . .
H(15) H(18) 2.220 ? . .
H(16) O(1) 3.122 ? . .
H(16) C(5) 2.107 ? . .
H(16) C(6) 2.893 ? . .
H(16) C(7) 3.101 ? . .
H(16) C(8) 3.023 ? . .
H(16) C(9) 3.496 ? . 56503
H(16) C(14) 2.976 ? . 56503
H(16) C(17) 3.597 ? . 46503
H(16) C(18) 2.098 ? . .
H(16) C(19) 3.348 ? . 46503
H(16) C(19) 3.563 ? . 56503
H(16) H(1) 2.689 ? . 46503
H(16) H(2) 3.011 ? . .
H(16) H(2) 2.610 ? . 56503
H(16) H(3) 3.309 ? . 46503
H(16) H(7) 2.443 ? . .
H(16) H(8) 3.466 ? . .
H(16) H(8) 3.178 ? . 56503
H(16) H(15) 1.822 ? . .
H(16) H(17) 2.162 ? . .
H(16) H(18) 2.793 ? . .
H(17) O(1) 2.159 ? . .
H(17) N(3) 3.510 ? . 45404
H(17) C(5) 2.991 ? . .
H(17) C(7) 2.964 ? . .
H(17) C(9) 3.094 ? . 56503
H(17) C(11) 3.295 ? . 56503
H(17) C(13) 3.440 ? . 45404
H(17) C(14) 2.991 ? . 56503
H(17) C(15) 2.166 ? . .
H(17) C(16) 3.397 ? . 56503
H(17) C(17) 3.452 ? . 46503
H(17) C(17) 3.307 ? . 56503
H(17) C(19) 3.107 ? . 56503
H(17) H(2) 3.376 ? . 56503
H(17) H(3) 2.632 ? . 46503
H(17) H(9) 3.578 ? . 56503
H(17) H(9) 3.558 ? . 45404
H(17) H(10) 2.752 ? . 45404
H(17) H(13) 3.495 ? . 45404
H(17) H(15) 2.997 ? . .
H(17) H(16) 2.162 ? . .
H(17) H(18) 1.988 ? . .
H(18) O(1) 2.058 ? . .
H(18) O(2) 3.348 ? . 45501
H(18) N(1) 3.089 ? . 55503
H(18) N(3) 3.236 ? . 45404
H(18) C(5) 3.141 ? . .
H(18) C(7) 3.059 ? . .
H(18) C(12) 2.935 ? . 55503
H(18) C(15) 2.145 ? . .
H(18) C(17) 3.488 ? . 46503
H(18) H(1) 3.578 ? . 46503
H(18) H(3) 2.539 ? . 46503
H(18) H(4) 3.524 ? . 55404
H(18) H(5) 2.863 ? . 45404
H(18) H(9) 2.921 ? . 45404
H(18) H(10) 3.480 ? . 45404
H(18) H(12) 2.737 ? . 55503
H(18) H(13) 2.547 ? . 55503
H(18) H(14) 3.074 ? . 55503
H(18) H(15) 2.220 ? . .
H(18) H(16) 2.793 ? . .
H(18) H(17) 1.988 ? . .


#==============================================================================

# Additional structures and associated data_? identifiers
# should be added at this point if there is more than one 
# structure analysis in the CIF.

#==============================================================================

#     End of CIF

#==============================================================================
